# Supplementary material for: The Free Radical Scavenging Property of the Leaves, Branches, and Roots of Mansoa hirsuta DC: In Vitro Assessment, 3D Pharmacophore, and Molecular Docking Study
Source: MDPI journal article supplement (doi:10.3390/molecules27186016), 2022-09-15
Supplement: s1 [file s1]

Supplementary Material

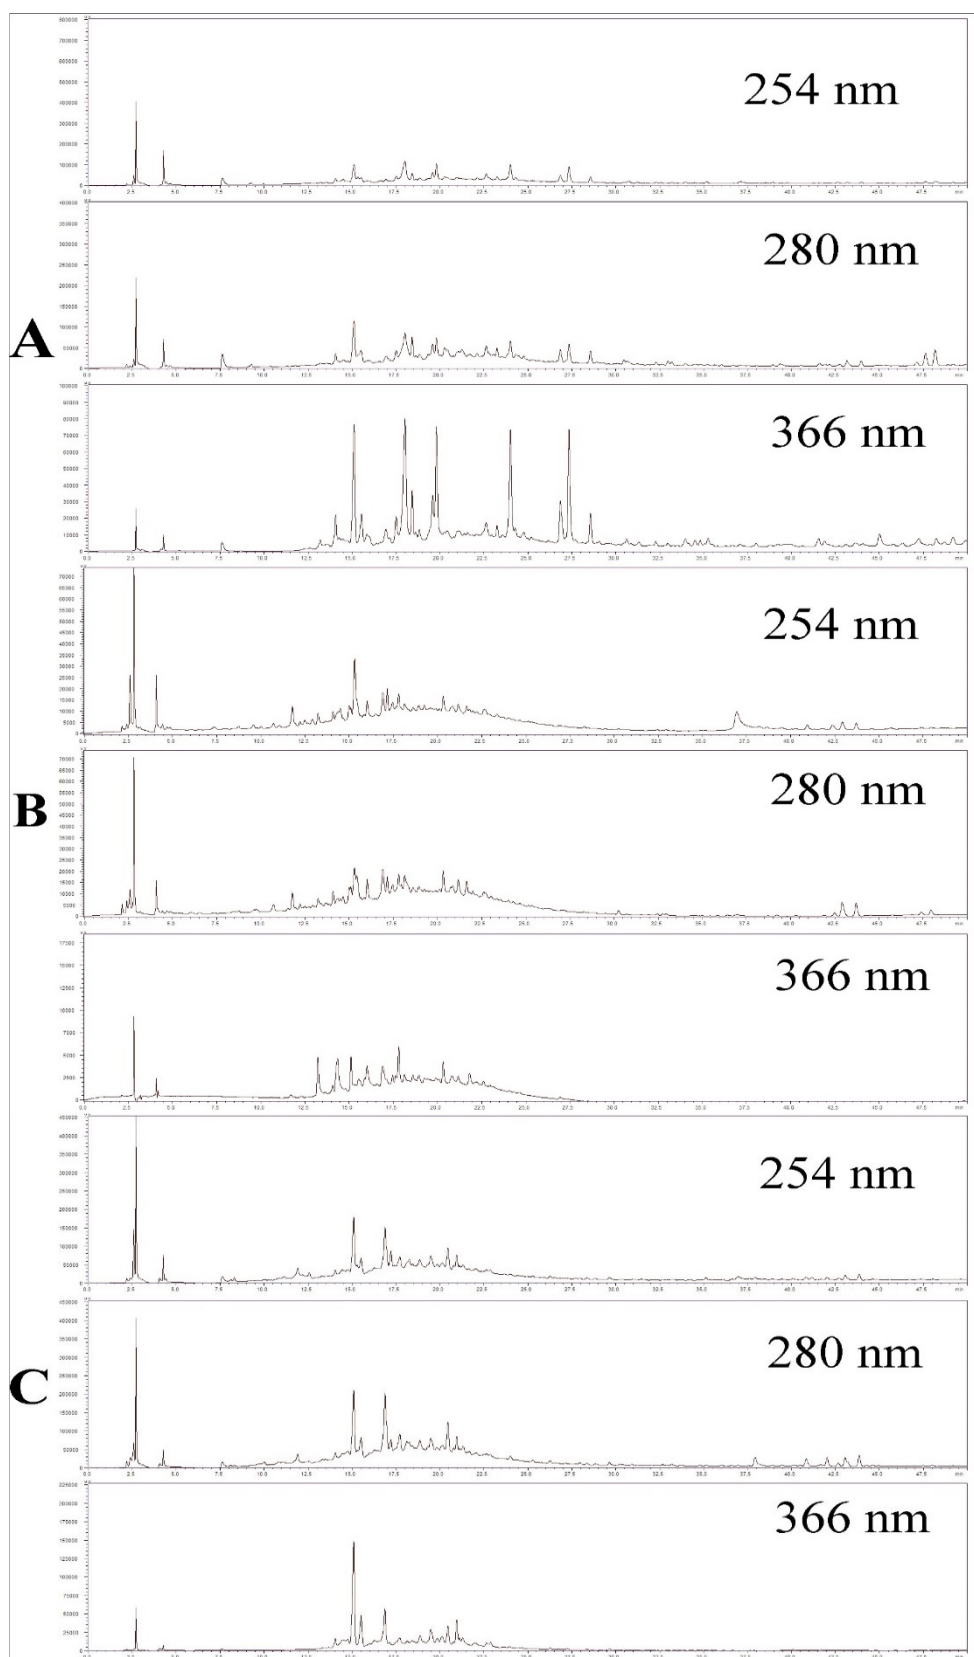

a: leaves; b: branches; c: roots.

**Figure S1.** Analytical chromatograms of methanol extract of *M. hirsuta* by HPLC-PDA, gradient mode in 65.5 min, injected sample solution 1 mg. mL<sup>-1</sup>, flow 1 mL. min<sup>-1</sup>, C<sub>18</sub> reverse phase column, detection at wavelengths 254 nm, 280 nm and 366 nm, <sup>a</sup> leaves, <sup>b</sup> branches and <sup>c</sup> roots

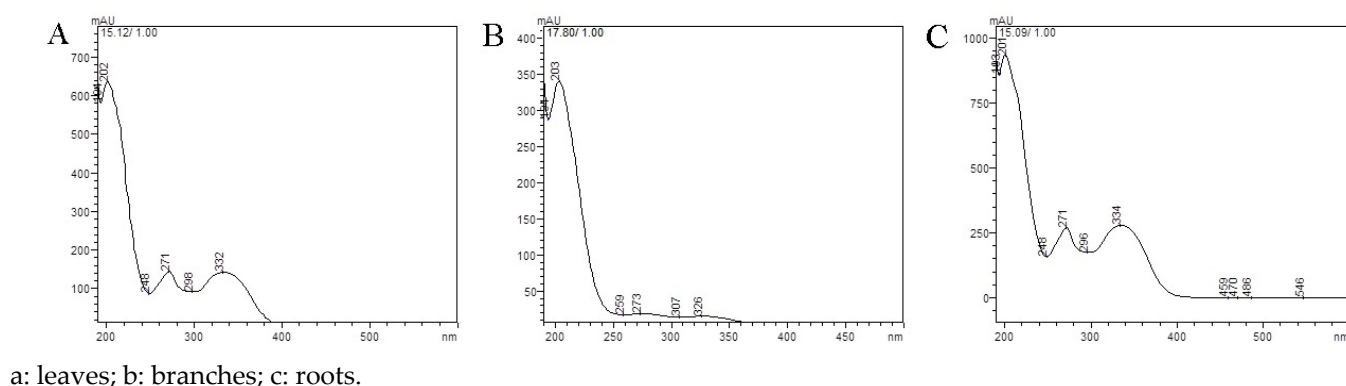

**Figure S2.** UV spectra at wavelengths in the range of 200 nm to 334 nm at the retention time 16.12min, 17.80min and 15.05min respectively. <sup>a</sup> leaves, <sup>b</sup> branches and <sup>c</sup> roots

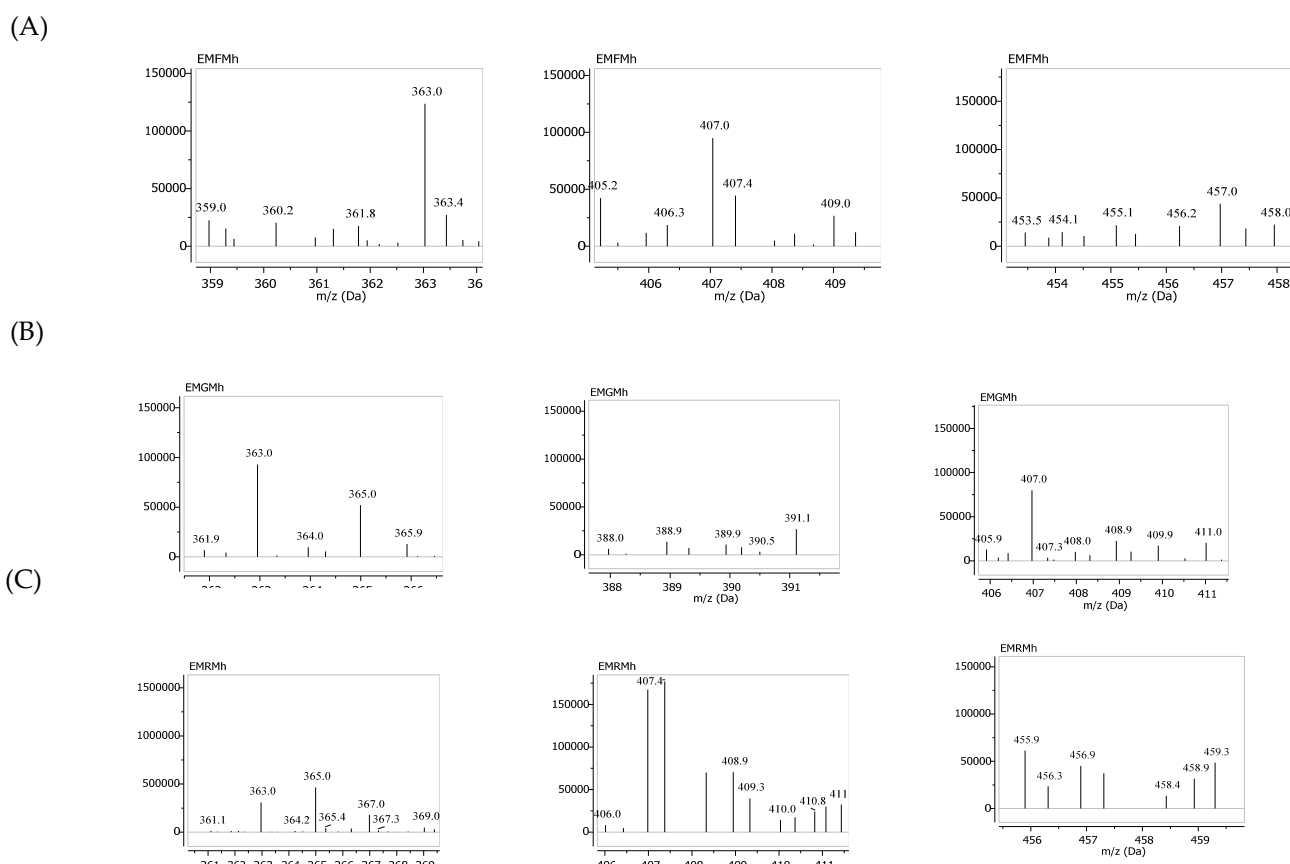

**Figure S3.** Spectra (A) leaves (B) branches (3) and (C) roots with the corresponding  $m/z$  fragments in the negative ionization mode of oleonolic and ursolic acid

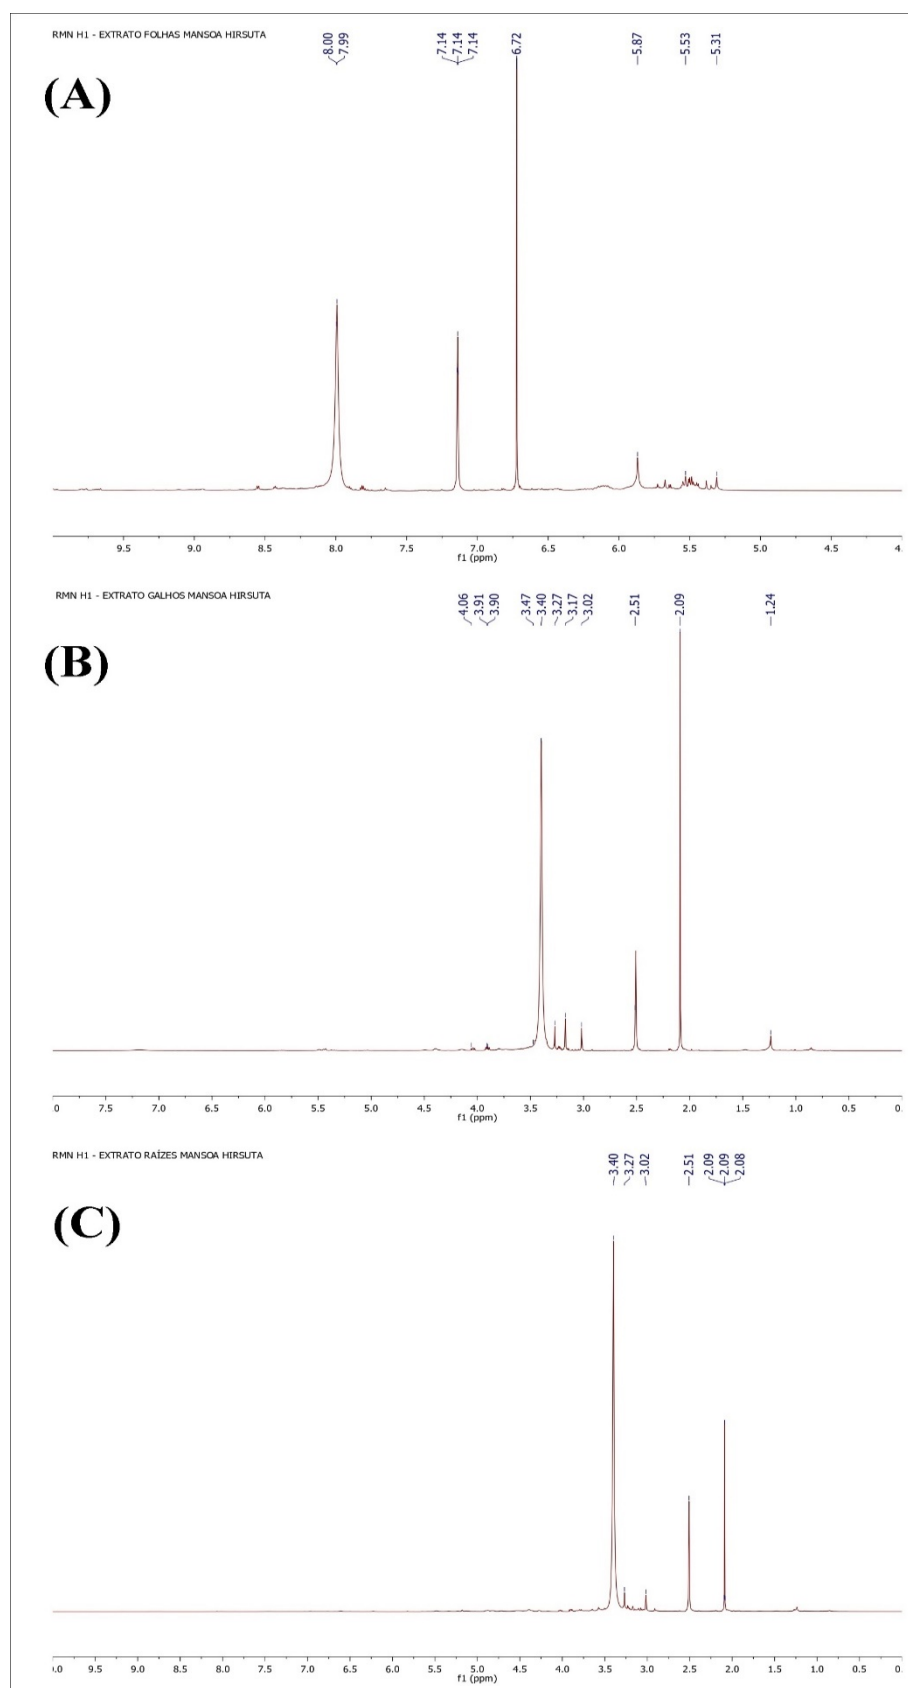

a: leaves; b: branches; c: roots.

**Figure S4.**  $^1\text{H}$  NMR spectra (DMSO- $d_6$ , 600 MHz) of methanol extract of leaves, branches and roots of *M. hirsuta*

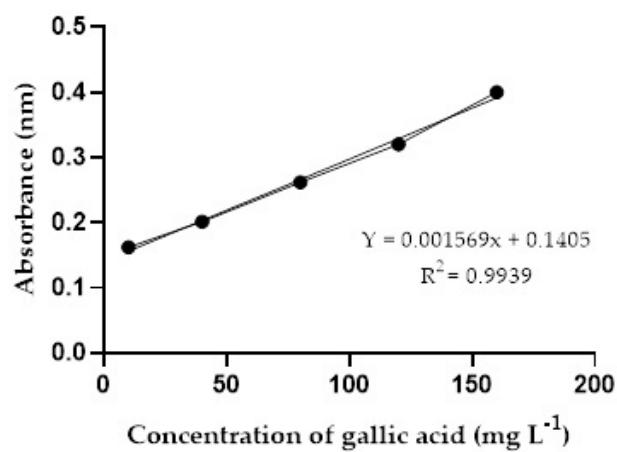

**Figure S5.** Standard curve of total phenols from *M. hirsuta* extracts
